# Supplementary material
Source: Springer Nature journal article supplement (https://www.springermedizin.de/resource/supplementary/12943_2013_1160_MOESM9_ESM.pdf/9552616)

**a****NIH/3T3**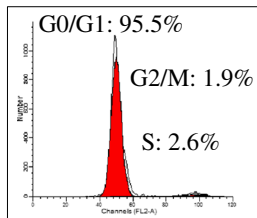**pcDNA3.1A**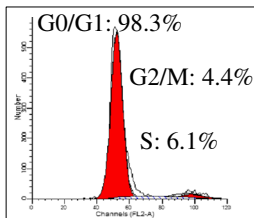**mPARM-1-pcDNA3.1A**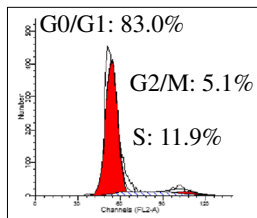**hPARM-1-pcDNA3.1A**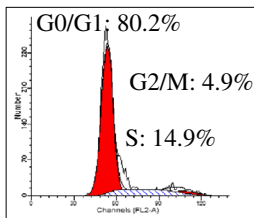**b****pcDNA3.1A****mPARM-1-pcDNA3.1A****hPARM-1-pcDNA3.1A**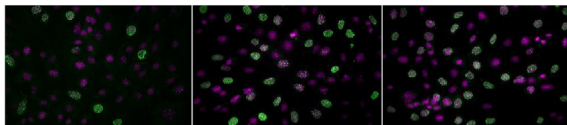**c**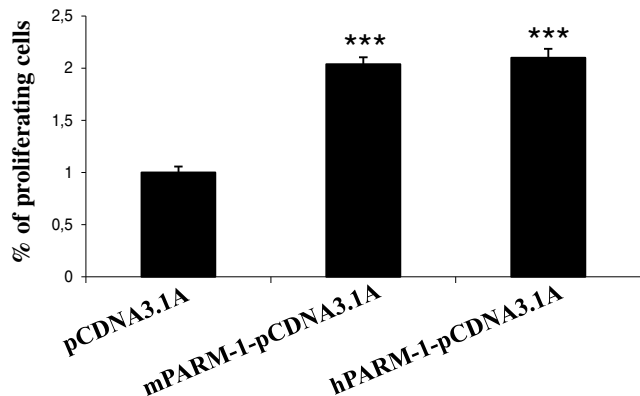

Supplement: MOESM9 [file 9552616]
